# Supplementary material for: Valence-band offset and forward-backward charge transfer in manganite/NiO and manganite/LaNiO3heterostructures
Source: Royal Society of Chemistry journal article supplement (doi:10.1039/c5nr06026e), 2015-01-01
Supplement: c5nr06026e1.pdf [file c5nr06026e1.pdf]

**Supplementary Information**

**Valence-band Offset and Forward-backward Charge Transfer in Manganite/NiO and  
Manganite/LaNiO<sub>3</sub> heterostructures**

*Xingkun Ning, Zhanjie Wang\*, and Zhidong Zhang*

Shenyang National Laboratory for Materials Science, Institute of Metal Research (IMR), Chinese  
Academy of Sciences (CAS), 72 Wenhua Road, Shenyang 110016, China

E-mail: wangzj@imr.ac.cn

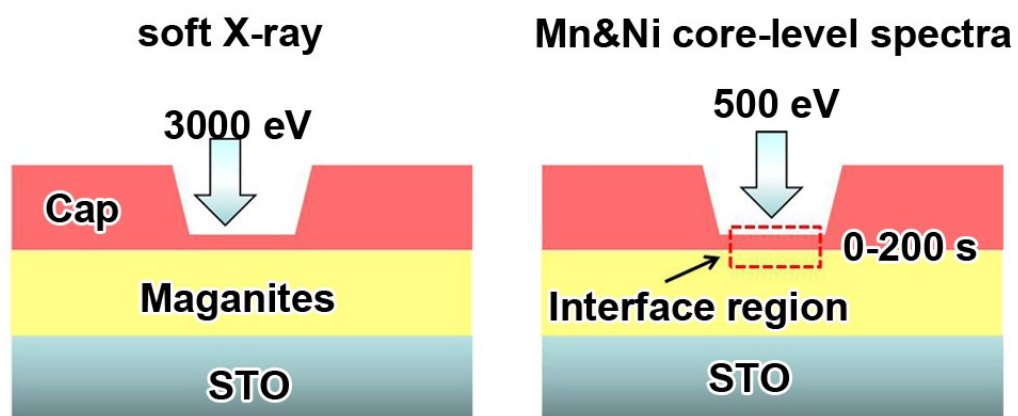

**Figure S1.** Schematic illustration of the XPS experimental procedure.

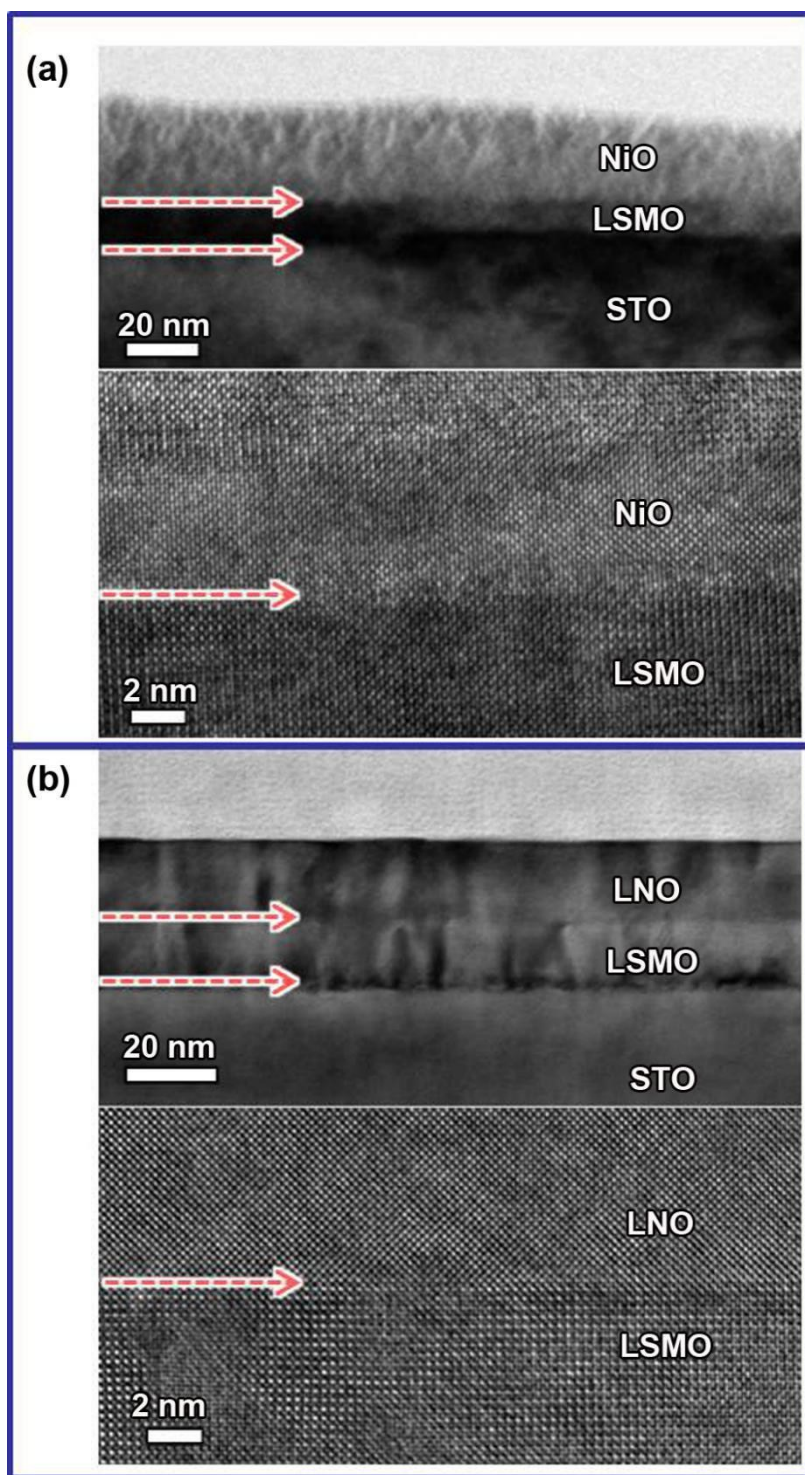

**Figure S2.** TEM and HRTEM images for the LSMO/NiO and LSMO/LNO heterostructures.

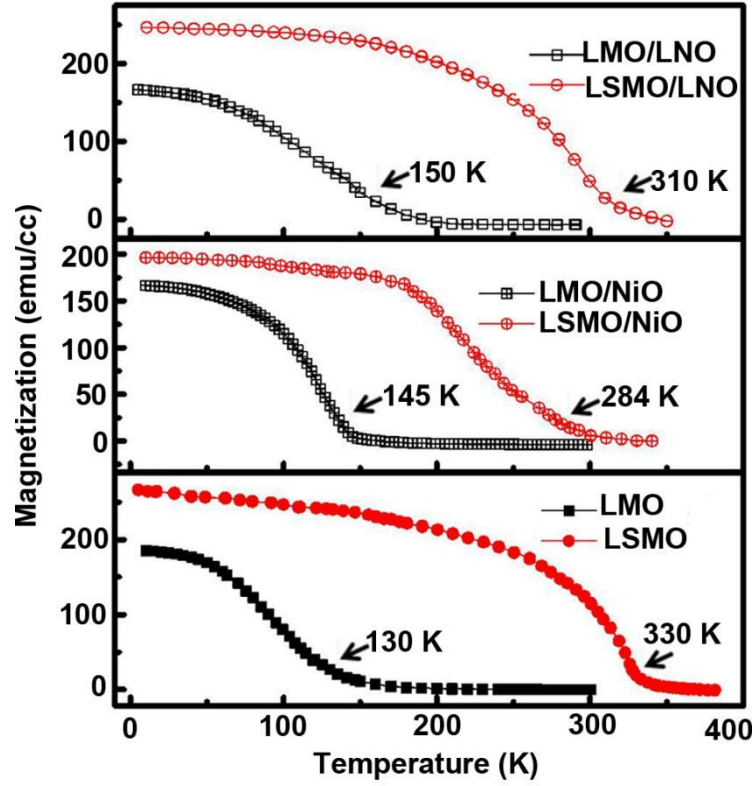

**Figure S3.** Temperature dependence of the magnetization measured in an in-plane magnetic field of 2000 Oe for the single LSMO and LMO films and the LSMO/NiO, LMO/NiO, LSMO/LNO and LMO/LNO heterostructures.

The temperature dependences of the magnetization after FC, measured in an in-plane magnetic field of 2000 Oe for the samples, are shown in Figure S3, respectively. For these films, the FC magnetization decreases with increasing temperature and a FM-PM transition is observed. The magnetic-ordering temperature  $T_C$  is determined to be 130 K and 330 K for the single LMO and LSMO film. The Curie temperatures are about 145 K, 150 K, 284 K and 310 K for the LMO/NiO, LMO/LNO, LSMO/NiO and LSMO/LNO films.
